# Supplementary material
Source: PubMed Central journal article supplement (PMC4004645)

# **Changes in glycosaminoglycan structure on differentiation of human embryonic stem cells towards mesoderm and endoderm lineages**

**Leyla Gasimli<sup>a†</sup>, Anne M. Hickey<sup>a†</sup>, Bo Yang<sup>b</sup>, Guoyun Li<sup>b</sup>, Mitche dela Rosa<sup>c</sup>,**

**Alison V. Nairn<sup>c</sup>, Michael J. Kulik<sup>d</sup>, Jonathan S. Dordick<sup>a,e,f,g</sup>, Kelley W. Moremen<sup>c</sup>,**

**Stephen Dalton<sup>d</sup> and Robert J. Linhardt<sup>a,b,e,f\*</sup>**

<sup>a</sup>Department of Biology, <sup>b</sup>Department of Chemistry and Chemical Biology, <sup>e</sup>Department of Chemical and Biological Engineering, <sup>f</sup>Department of Biomedical Engineering, <sup>g</sup>Department of Materials Science and Engineering, Center for Biotechnology and Interdisciplinary Studies, Rensselaer Polytechnic Institute, Troy NY 12180; <sup>c</sup>Complex Carbohydrate Research Center, <sup>d</sup>Department of Biochemistry and Molecular Biology, University of Georgia, Athens, Georgia 30602.

**Supplementary Figure 1.** Expression of hepatic markers in H9 cells differentiated into hepatic lineage cells.

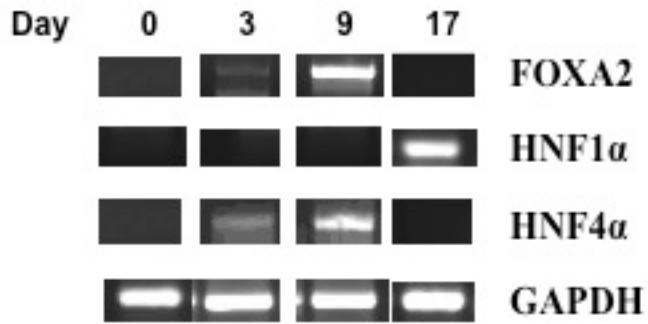

**Supplementary Figure 2.** HepG2 cells expressing markers of mature hepatocytes.

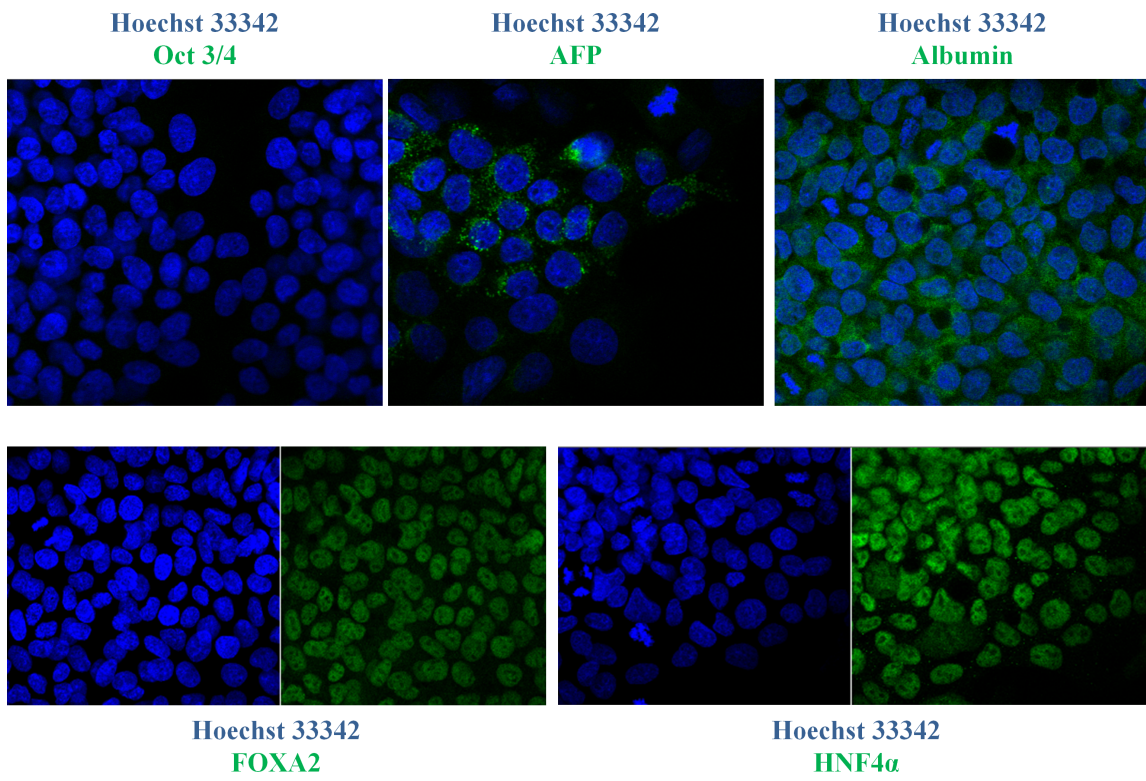

Supplement: NIHMS554710-supplement-01.pdf [file NIHMS554710-supplement-01.pdf]
